# Supplementary material for: Microplastic Contamination in Pacific Oysters (Crassostrea gigas) from Haizhou Bay: Tissue-Specific Distribution, Digestive Enzyme Dysfunction, and Lipid Metabolism Perturbation
Source: Research Square preprint supplement (doi:10.21203/rs.3.rs-6950430/v1), 2025-08-20
Supplement: Supplementary file 1 [file f086d9b482cafa90c12924bf.docx]

**Supplementary information**

**Author name:** Chunmei Gaoa,d, Zhuolong Wua, Baogui Lianga, Jikun Lue, Guanghui Fue, Miaomiao Sune, Wenwen Yuf, Lu Lue, Zhihua Fengh, Shuo Zhangb,c,*, Shike Gaob,g,*

Chunmei Gao and Zhuolong Wu made identical contributions to the manuscript and are therefore co-first authors

*Corresponding author: [s-zhang@shou.edu.cn](mailto:) (Shuo Zhang) (Orcid: 0000-0002-3489-5290);

skgao@shou.edu.cn (Shike Gao)

a. *College of Oceanography and Ecological Science, Shanghai Ocean University, Shanghai* 201306*, China*

b. *College of Marine living Resource Sciences and Management, Shanghai Ocean University, Shanghai* 201306*, China*

c. *Joint Laboratory for Monitoring and Conservation of Aquatic Living Resources in the Yangtze Estuary, Shanghai* 200000*, China*

d. *Shanghai Ocean University Environmental Monitoring and Evaluation Center, Shanghai* 201306*, China*

e. *Marine and Fishery Development Promotion Center In Lianyungang, Lianyungang* 222002*, Jiangsu, China*

f. *Jiangsu Research Institute of Marine Fisheries, Nantong* 226007*, China*

g. *Atmosphere and Ocean Research Institute, The University of Tokyo, Chiba* 277–8564*, Japan*

*h jiangsu Key Laboratory of Marine Bioresources and Environment, Jiangsu Ocean University, Lianyungang 222005, China*

# 1 Enzyme activity

#### 1.1 Glutathione reductase

The reagent manufacturer is Nanjing Jiancheng Biological Engineering Research Institute (China), article number: A062-1-1. Oxidized glutathione was catalyzed by glutathione reductase (Gr) to produce reduced glutathione by hydrogen supply from NADPH. The reduced glutathione increased and NADPH decreased. A decrease in the absorbance value of NADPH was detected at 340 nm. By detecting changes in NADPH, the activity of glutathione reductase can be calculated.

#### 1.2 Trypsin

The reagent manufacturer is Nanjing Jiancheng Biological Engineering Research Institute, article number: A080-2-2. Trypsin can catalyze the hydrolysis of the ester chain of the substrate arginine ethyl ester, so that its absorbance value at 253 nm can be increased, and the activity of the enzyme can be calculated according to the change of absorbance.

#### 1.3 Lipase

The reagent manufacturer is Nanjing Jiancheng Biological Engineering Research Institute, article number: A054-1-1. Latex made of triglyceride and water has a milky character due to the absorption and scattering of incident light by its micelles. The triglycerides in the micelles are hydrolyzed under the action of Lipase, which causes the micelles to divide, and the scattered light or turbidity is thus reduced, and the rate of reduction is related to the lipase activity.

#### 1.4 Amylase

The reagent manufacturer is Nanjing Jiancheng Biological Engineering Research Institute, article number: C016-1-1. α-amylase (AMS) can hydrolyze starch to produce glucose, maltose and dextrin. When the concentration of substrate is known and excessive, iodine is added to combine with unhydrolyzed starch to form blue complex. The amount of hydrolyzed starch can be calculated according to the depth of blue, so as to calculate the activity of amylase.

# 2 GC-MS Setup Parameters Parameter

The fatty acid components were quantitatively analyzed using a gas chromatograph (7890B GC, Agilent) connected to a flamed ion detector (FID) from Agilent Technologies on a DB-23 (30 m 0.25 mm 0.25 µm) column. Agilent, the carrier gas is high purity helium (helium purity, %≥99.999%). The temperature of the detector is set to 280 ℃. The injection volume was 1µl, and the inlet was set to the non-shunt mode. The heating program of the column box is set as follows: the initial temperature is 50℃, held for 1 min, then it is raised to 175℃ at 25 ℃/min, and then it is raised to 230℃ at 4 ℃/min, and held for 5 min. The relative response factor for each fatty acid was determined from a known concentration of the mixed reference material (NU-CHEK PREP INC., USA). The mixed reference material contains 40 fatty acid methyl esters with a carbon atomic number of 4-22 and an unsaturation of 0 to 6. Fatty acids were quantified by internal standard method. The fatty acid components were qualitatively analyzed by a gas chromatographic mass spectrometer (7890B GC-5977A MSD, Agilent) with an ion source of EI (70 eV). The mass spectrum scan range is 50−550 Da. The scanned mass spectra were compared with the NIST 14 mass spectrometry library and the mixed standard of 40 fatty acid methyl esters (NU-CHEK PREP INC., USA) for qualitative analysis of fatty acids. The chromatographic conditions for GC-MSD (e.g. column, sample size, and column box temperature procedure) are the same as for GC-FID. The electron bombardment ion source mode (EI) was adopted for mass spectrometry. The ion source temperature was 230℃, the interface temperature was 280℃, the quadrupole temperature was 150℃, the electron bombardment energy was 70 eV, and the full spectrum scanning mode (SCAN) was adopted.
